# Supplementary material for: Influence of petrology on geotechnical characteristics of lateritic gravels from Lolabe-Campo area (Atlantic Ocean, Cameroon) and their valorization in road construction
Source: Research Square preprint supplement (doi:10.21203/rs.3.rs-7895511/v1), 2025-11-04
Supplement: Supplementary file 1 [file 28e84e559b88c46ac9a397a3.docx]

**Table 6:** Correlation matrix (Pearson) between the constituent oxides of the lateritic gravels and their geotechnical parameters

| Variables | Al2O3 | SiO2 | Fe2O3 | Fine | Skeleton | Specific gravity | Pebble | Gravel | Sand | Clays | Gm | Pm | PI | MDD | OMC | CBR at 95% MDD | CBR at 100% MDD |
| --- | --- | --- | --- | --- | --- | --- | --- | --- | --- | --- | --- | --- | --- | --- | --- | --- | --- |
| Al2O3 | **1.00** | 0.11 | **-0.52** | 0.07 | 0.28 | -0.03 | -0.27 | -0.28 | 0.31 | 0.22 | -0.24 | -0.05 | -0.37 | -0.25 | -0.14 | -0.05 | 0.00 |
| SiO2 | 0.11 | **1.00** | **-0.84** | -0.01 | 0.41 | 0.00 | **-0.53** | -0.41 | 0.50 | 0.08 | -0.33 | 0.26 | -0.12 | 0.41 | -0.33 | 0.37 | 0.47 |
| P2O5 | 0.24 | -0.12 | 0.13 | -0.31 | -0.44 | **0.56** | 0.46 | 0.44 | -0.39 | -0.17 | 0.44 | -0.31 | 0.16 | 0.13 | 0.30 | 0.04 | -0.21 |
| K2O | -0.07 | 0.31 | -0.39 | 0.19 | 0.47 | -0.12 | -0.43 | -0.47 | 0.48 | 0.18 | -0.45 | 0.10 | **-05.3** | 0.19 | -0.28 | 0.33 | -0.03 |
| Cr2O3 | **-0.62** | **-0.62** | **0.59** | -0.07 | -0.26 | -0.12 | 0.36 | 0.26 | -0.28 | -0.21 | 0.22 | -0.15 | 0.08 | 0.04 | -006 | -002 | -0.05 |
| TiO2 | **0.56** | 0.09 | -0.17 | -0.11 | 0.01 | 0.29 | -0.04 | -0.01 | 0.06 | 0.02 | 0.04 | -0.06 | 0.03 | -0.28 | 0.29 | -0.29 | -0.23 |
| MnO | 0.24 | 0.27 | -0.29 | -0.23 | 0.05 | -0.11 | -0.10 | -0.05 | 0.19 | -0.11 | 0.01 | -0.07 | -00.5 | 0.29 | -0.46 | 0.26 | 0.20 |
| Fe2O3 | **-0.52** | **-0.84** | **1.00** | -0.01 | **-0.54** | 0.10 | **0.60** | **0.54** | **-0.65** | -0.13 | 0.44 | -0.18 | 0.37 | -0.29 | 0.51 | -0.35 | -0.47 |
| *Values in bold are different from 0 at a significance level of alpha=0.05* | | | | | | | | | | | | | | | | | |
