# Supplementary material for: Influence of petrology on geotechnical characteristics of lateritic gravels from Lolabe-Campo area (Atlantic Ocean, Cameroon) and their valorization in road construction
Source: Research Square preprint supplement (doi:10.21203/rs.3.rs-7895511/v1), 2025-11-04
Supplement: Supplementary file 2 [file 4de836516a2e06a1a491492f.docx]

**Table 2:** Major oxides distribution and weathering parameters of the lateritic gravels

|  | |  | **Quartzites** | | | |  | **Gneiss** | | | |  | **Metasyenite** | | |  | **Micaschists** | | | |  |
| --- | --- | --- | --- | --- | --- | --- | --- | --- | --- | --- | --- | --- | --- | --- | --- | --- | --- | --- | --- | --- | --- |
| **Oxide (mass %)** | |  | **EQ1N** | **EQ2N** | **EQ4N** | **EQ5N** | **Mean** | **EG1N** | **EG4N** | **EG8N** | **EG9N** | **Mean** | **ES1N** | **ES2N** | **ES5N** | **Mean** | **EM1N** | **EM2N** | **EM4N** | **EM6N** | **Mean** |
| MgO | |  | - | - | 0.24 | 0.36 | 0.15 | - | 0.66 | - | - | 0.17 | - | 2.95 | - | 0.98 | - | - | - | - | - |
| Al2O3 | |  | 18.94 | 24.82 | 27.45 | 47.11 | 29.58 | 20.01 | 25.20 | 19.92 | 21.00 | 21.53 | 29.90 | 3.60 | 35.38 | 22.96 | 27.16 | 22.33 | 19.37 | 26.35 | 23.80 |
| SiO2 | |  | 38.96 | 45.70 | 22.63 | 28.59 | 33.97 | 30.76 | 49.10 | 66.02 | 34.02 | 44.98 | 25.50 | 5.15 | 37.14 | 22.60 | 40.50 | 50.40 | 47.44 | 38.38 | 44.18 |
| P2O5 | |  | 0.38 | 0.04 | 0.24 | 0.04 | 0.18 | 0.07 | 0.13 | 0.01 | 0.13 | 0.09 | 0.23 | 0.00 | 0.28 | 0.17 | 0.20 | 0.10 | 0.00 | 0.20 | 0.13 |
| K2O | |  | 0.51 | 1.04 | 0.07 | 0.90 | 0.63 | 0.26 | 1.55 | 0.79 | 0.37 | 0.74 | 0.23 | 1.00 | 0.15 | 0.46 | 1.42 | 1.99 | 0.12 | 0.75 | 1.07 |
| Cr2O3 | |  | 0.07 | 0.12 | 0.14 | 0.02 | 0.09 | 0.14 | 0.05 | 0.07 | 0.11 | 0.09 | 0.12 | 21.37 | 0.11 | 7.20 | 0.06 | 0.68 | 0.08 | 0.11 | 0.23 |
| TiO2 | |  | 1.69 | 0.68 | 1.98 | 1.41 | 1.44 | 1.22 | 1.49 | 0.81 | 1.00 | 1.13 | 1.06 | - | 1.36 | 0.81 | 0.93 | 0.98 | 0.80 | 1.34 | 1.01 |
| MnO | |  | 0.05 | 0.00 | 0.04 | 0.04 | 0.03 | 0.04 | 0.03 | 0.05 | 0.00 | 0.03 | 0.05 | - | 0.04 | 0.03 | 0.00 | 0.07 | 0.03 | - | 0.03 |
| Fe2O3 | |  | 39.19 | 27.35 | 46.83 | 21.01 | 33.60 | 47.26 | 21.60 | 12.19 | 43.15 | 31.05 | 42.48 | 60.86 | 25.20 | 42.85 | 29.46 | 24.00 | 30.81 | 32.47 | 29.19 |
| CaO | |  | - | - | - | - | - | - | 0.01 | 0.02 | 0.00 | 0.01 | 0.01 | - | - | - | - | - | - | - | - |
| Na2O | |  | - | - | - | - | - | - | - | - | - | - | - | - | - | - | - | - | - | - | - |
| CaO * | |  | - | - | - | - | - | - | - | - | - | - | - | - | - | - | - | - | - | - | - |
| LOI | |  | 0.39 | 0.50 | 0.87 | 0.66 | 0.61 | 0.73 | 0.36 | 0.29 | 0.70 | 0.52 | 0.65 | 0.66 | 0.52 | 0.61 | 0.59 | 0.26 | 0.40 | 0.42 | 0.42 |
| Total Al2O3+SiO2+Fe2O3 | |  | 97.09 | 97.87 | 96.91 | 96.71 | 97.15 | 98.03 | 95.90 | 98.13 | 98.17 | 97.56 | 97.88 | 69.61 | 97.72 | 88.40 | 97.12 | 96.73 | 97.62 | 97.20 | 97.17 |
| Total | |  | 100.18 | 100.25 | 100.49 | 100.14 | 100.27 | 100.49 | 100.18 | 100.17 | 100.48 | 100.33 | 100.23 | 95.59 | 100.18 | 98.67 | 100.32 | 100.81 | 99.05 | 100.02 | 100.05 |
| CIA | Value |  | 99.42 | 96.02 | 101.85 | 98.17 | 98.87 | 99.43 | 94.79 | 95.83 | 99.58 | 97.41 | 100.96 | 76.88 | 101.46 | 93.10 | 96.25 | 92.10 | 99.33 | 98.75 | 96.61 |
| Degree of weathering |  | Extreme | Extreme | Extreme | Extreme | Extreme | Extreme | Extreme | Extreme | Extreme | Extreme | Extreme | Extreme | Extreme | Extreme | Extreme | Extreme | Extreme | Extreme | Extreme |
| IOL | |  | 59.87 | 53.31 | 76.65 | 70.44 | 65.07 | 68.62 | 48.80 | 32.72 | 65.35 | 53.87 | 73.95 | 92.60 | 61.99 | 76.18 | 58.30 | 47.90 | 51.40 | 60.51 | 54.53 |
| MIA | |  | 99.75 | 97.62 | 99.81 | 97.13 | 98.58 | 99.77 | 92.74 | 96.96 | 99.82 | 97.32 | 100.50 | 83.25 | 101.00 | 94.91 | 97.75 | 95.16 | 99.67 | 99.30 | 97.97 |
| S/R | Value |  | 0.67 | 0.88 | 0.30 | 0.42 | 0.57 | 0.46 | 1.05 | 2.06 | 0.53 | 1.02 | 0.35 | 0.08 | 0.61 | 0.35 | 0.72 | 1.09 | 0.95 | 0.65 | 0.85 |
| Degree of laterization |  | True laterites | True laterites | True laterites | True laterites | True laterite | True laterites | True laterites | Non- lateritic materials | True laterites | True laterite | True laterites | True laterites | True laterites | True laterite | True laterites | True laterites | True laterites | True laterites | True laterite |
