# Supplementary material for: Influence of petrology on geotechnical characteristics of lateritic gravels from Lolabe-Campo area (Atlantic Ocean, Cameroon) and their valorization in road construction
Source: Research Square preprint supplement (doi:10.21203/rs.3.rs-7895511/v1), 2025-11-04
Supplement: Supplementary file 3 [file 502cc04f5187d0bc5e04082f.docx]

**Table 4:** Summary of the geotechnical data of the lateritic gravels from Lolabe-Campo area.

|  | | | |  | | **Micaschist** | | | | | | | | | **Quartzites** | | | | | **Metasyenite** | | | | **Gneiss** | | | | | | |
| --- | --- | --- | --- | --- | --- | --- | --- | --- | --- | --- | --- | --- | --- | --- | --- | --- | --- | --- | --- | --- | --- | --- | --- | --- | --- | --- | --- | --- | --- | --- |
| **Sample codes** | | | |  | | **EM1N** | | **EM2N** | | **EM4N** | | **EM6N** | | **Mean** | **EQ1N** | **EQ2N** | **EQ4N** | **EQ5N** | **Mean** | **ES1N** | **ES2N** | **ES5N** | **Mean** | **EG1N** | **EG4N** | | **EG8N** | | **EG9N** | **Mean** |
| **Thickness (m)** | | | |  | | 0.70 | | 1.00 | | 0.70 | | 0.50 | | 0.73 | 1.00 | 1.20 | 0.80 | 0.90 | 0.98 | 0.30 | 0.30 | 0.50 | 0.37 | 0.30 | 0.30 | | 0.40 | | 0.40 | 0.35 |
| **Natural water content** | | | |  | | 11.20 | | 7.50 | | 11.60 | | 12.30 | | 10.65 | 12.70 | 19.60 | 24.00 | 18.60 | 18.73 | 11.40 | 15.10 | 16.90 | 14.47 | 10.30 | 9.00 | | 8.90 | | 17.50 | 11.43 |
| **Specific weight g s (T/m 3 )** | | | |  | | 2.71 | | 2.79 | | 2.72 | | 2.90 | | 2.78 | 2.97 | 2.73 | 2.68 | 2.68 | 2.76 | 2.60 | 2.70 | 2.91 | 2.74 | 2.75 | 2.68 | | 2.60 | | 2.84 | 2.72 |
|  | | | |  | |  | |  | |  | |  | |  |  |  |  |  |  |  |  |  |  |  |  | |  | |  |  |
| Particle size distribution | Pebble (4 to 63 mm) | |  | | 45.11 | | 53.16 | | 49.96 | | 65.41 | | 53.41 | | 68.01 | 52.78 | 63.66 | 41.67 | 56.53 | 60.78 | 69.11 | 65.16 | 65.02 | 46.65 | | 28.52 | | 42.85 | 56.33 | 43.59 |
| Gravel (>2 mm) | |  | | 52.42 | | 63.34 | | 60.72 | | 76.51 | | 63.25 | | 79.22 | 60.73 | 70.35 | 50.88 | 65.30 | 68.91 | 73.88 | 71.59 | 71.46 | 58.02 | | 35.91 | | 56.73 | 68.77 | 54.86 |
| Skeleton (<2 mm) | |  | | 47.58 | | 36.66 | | 39.28 | | 23.49 | | 36.75 | | 20.78 | 39.27 | 29.65 | 49.12 | 34.71 | 31.09 | 26.12 | 28.41 | 28.54 | 41.98 | | 64.09 | | 43.27 | 31.23 | 45.14 |
| Mortar (< 425 µm) | |  | | 39.12 | | 29.67 | | 29.95 | | 14.44 | | 20.82 | | 18.23 | 32.17 | 25.44 | 35.33 | 13.76 | 25.52 | 22.60 | 21.62 | 12.90 | 30.82 | | 44.25 | | 30.95 | 25.54 | 24.46 |
| Sand (between 2 and 0.08 mm) | |  | | 23.01 | | 22.29 | | 23.23 | | 14.75 | | 28.30 | | 5.59 | 13.29 | 8.46 | 27.70 | 27.79 | 13.10 | 8.95 | 16.64 | 23.25 | 21.31 | | 41.71 | | 24.63 | 10.20 | 32.89 |
| Fine (< 75 µm) | |  | | 23.79 | | 14.19 | | 15.53 | | 8.37 | | 15.93 | | 14.60 | 24.99 | 20.60 | 20.21 | 20.95 | 17.00 | 16.59 | 11.39 | 15.64 | 19.84 | | 20.19 | | 17.82 | 19.02 | 20.68 |
| Silt and clays (< 80 µm) | |  | | 24.57 | | 14.37 | | 16.05 | | 8.74 | | 15.47 | | 15.19 | 25.98 | 21.19 | 21.42 | 20.10 | 17.99 | 17.17 | 11.77 | 14.99 | 20.67 | | 22.38 | | 18.64 | 21.03 | 19.22 |
| < 2 µm (Clays) | |  | | 17.00 | | 9.00 | | 8.00 | | 5.00 | | 9.75 | | 10.00 | 18.00 | 14.00 | 14.00 | 14.00 | 12.00 | 9.00 | 8.00 | 9.67 | 14.00 | | 13.00 | | 13.00 | 11.00 | 12.75 |
|  |  | |  | |  | |  | |  | |  | |  | |  |  |  |  |  |  |  |  |  |  | |  | |  |  |  |
| Derived parameters | Grading modulus (Gm) | |  | | 1.90 | | 2.19 | | 2.15 | | 2.54 | | 2.19 | | 2.46 | 2.04 | 2.24 | 1.95 | 2.17 | 2.26 | 2.35 | 2.39 | 2.33 | 2.07 | | 1.71 | | 2.08 | 2.24 | 2.03 |
| Activity ratio (Ac) | |  | | 1.33 | | 2.05 | | 4.22 | | 3.47 | | 2.77 | | 3.00 | 1.41 | 2.18 | 1.26 | 1.96 | 2.08 | 2.87 | 3.03 | 2.66 | 1.49 | | 1.83 | | 1.72 | 2.47 | 1.88 |
| Plasticity modulus (Pm) | |  | | 882.16 | | 547.41 | | 1010.81 | | 250.53 | | 672.73 | | 546.90 | 813.90 | 775.92 | 625.34 | 690.52 | 638.00 | 583.08 | 523.20 | 581.43 | 644.14 | | 1050.94 | | 691.73 | 694.69 | 770.37 |
| Plasticity product (Pp) | |  | | 554.05 | | 261.71 | | 523.97 | | 145.22 | | 371.24 | | 437.85 | 632.25 | 628.15 | 357.72 | 513.99 | 424.88 | 427.89 | 275.52 | 376.10 | 414.55 | | 479.51 | | 398.28 | 517.21 | 452.39 |
| Swelling potential εs) | |  | | 0.01 | | 0.01 | | 0.03 | | 0.01 | | 0.01 | | 0.02 | 0.01 | 0.02 | 0.01 | 0.02 | 0.01 | 0.01 | 0.01 | 0.01 | 0.01 | | 0.01 | | 0.01 | 0.02 | 0.01 |
|  |  | |  | |  | |  | |  | |  | |  | |  |  |  |  |  |  |  |  |  |  | |  | |  |  |  |
| Argilosity | Atterberg Limits | LL (%) |  | | 50.40 | | 42.90 | | 64.50 | | 37.10 | | 48.73 | | 75.00 | 60.20 | 65.90 | 38.40 | 59.88 | 61.60 | 64.00 | 55.60 | 60.4 | 47.10 | | 54.70 | | 49.00 | 37.10 | 46.96 |
| LP (%) |  | | 27.85 | | 24.45 | | 30.75 | | 19.75 | | 25.7 | | 45.00 | 34.90 | 35.40 | 20.70 | 34 | 36.60 | 38.20 | 31.40 | 35.4 | 26.20 | | 30.95 | | 26.65 | 45.00 | 32.2 |
| PI (%) |  | | 22.55 | | 18.45 | | 33.75 | | 17.35 | | 23.03 | | 30.00 | 25.30 | 30.50 | 17.70 | 25.88 | 25.00 | 25.80 | 24.20 | 25.00 | 20.90 | | 23.75 | | 22. 35 | 33.75 | 26.13 |
| Methylene blue value | |  | | 0.22 | | 0.23 | | 0.22 | | 0.21 | | 0.22 | | 0.24 | 0.22 | 0.22 | 0.24 | 0.23 | 0.20 | 0.26 | 0.24 | 0.23 | 0.22 | | 0.22 | | 0.22 | 0.24 | 0.23 |
|  |  | |  | |  | |  | |  | |  | |  | |  |  |  |  |  |  |  |  |  |  | |  | |  |  |  |
| Modified proctor | Maximum Dry Density (MDD) (T/m 3) | |  | | 2.03 | | 2.13 | | 2.11 | | 2.05 | | 2.08 | | 2.12 | 2.00 | 1.85 | 1.92 | 1.97 | 2.03 | 2.03 | 2.12 | 2.06 | 1.97 | | 1.98 | | 2.07 | 1.92 | 1.98 |
| Optimum Moisture Content (OMC%) | |  | | 11.90 | | 10.50 | | 10.00 | | 13.60 | | 11.50 | | 12.70 | 12.90 | 15.00 | 10.00 | 12.65 | 9.40 | 11.60 | 12.00 | 11.00 | 14.10 | | 11.40 | | 8.70 | 16.70 | 12.73 |
|  |  | |  | |  | |  | |  | |  | |  | |  |  |  |  |  |  |  |  |  |  | |  | |  |  |  |
| CBR | (%) at 95% of Maximum Dry Density (MDD) | |  | | 31.00 | | 39.00 | | 33.00 | | 30.00 | | 33 | | 35.00 | 37.00 | 26.00 | 30.00 | 32 | 32.00 | 32.00 | 38.00 | 34 | 30.00 | | 31.00 | | 32.00 | 30.00 | 31 |
| (%) at 100% of MDD | |  | | 41.00 | | 46.00 | | 46.00 | | 46.00 | | 45 | | 51.00 | 52.00 | 38.00 | 49.00 | 48 | 41.00 | 45.00 | 51.00 | 46 | 45.00 | | 38.00 | | 60.00 | 42.00 | 46 |
|  |  | |  | |  | |  | |  | |  | |  | |  |  |  |  |  |  |  |  |  |  | |  | |  |  |  |
| Classification | HRB | |  | | A-2-7  (1) | | A-2-7  (0) | | A-2-7  (0) | | A-2-6  (0) | | A-2-7 (0. 1)  A-2-6 (0) | | A-2-7  (0) | A-2-7  (2) | A-2-7  (1) | A-2-6  (0) | A-2-7 (0. 1. 2)  A-2-6 (0) | A-2-7  (0) | A-2-7  (0) | A-2-7  (0) | A-2-7 (0) | A-2-7  (1) | | A-2-7  (1) | | A-2-7  (0) | A-2-7  (1) | A-2-7 (0). (1) |
| GTR | |  | | I2m | | I2s | | 12 h | | I2s | | I2s. m. h | | I2m | 12th | I2ts | 12th | I2m. th. ts | 12 h. | 12th | 12th | I2th. h | I2s | | I2ts | | I2m | I2m | I2m. s. ts |
| Bagarre (1990) | |  | | GL2 | | GL2 | | GL2 | | GL1 | | Gl2 | | GL2 | GL3 | GL3 | GL2 |  | GL2 | GL2 | GL2 | Gl2 | GL2 | | GL2 | | GL2 | GL2 | Gl2 |

*PI= Plasticity Index, LL: Liquid limit, LP: Plastic limit; Gm = [300 – (% ≤ 2 mm +%< 425 μ m +%<75 μm)]/100, Pm = PI x percentage passing 425 μ m test sieve (Charman 1988), Pp = PI x percentage p*

*assing 75 μm test sieve (Charman 1988), ε s =1×10 − 5 x PI2.24 (Millogo et al. 2008*)
