# Supplementary material for: Influence of petrology on geotechnical characteristics of lateritic gravels from Lolabe-Campo area (Atlantic Ocean, Cameroon) and their valorization in road construction
Source: Research Square preprint supplement (doi:10.21203/rs.3.rs-7895511/v1), 2025-11-04
Supplement: Supplementary file 4 [file 81779bbc675bff60036d2646.docx]

**Table 3:** Concentrations of chemical elements in the lateritic gravels obtained by EDS

|  |  | **Mean values of concentrations of major chemical elements obtained by EDS** | | | | | | |  |
| --- | --- | --- | --- | --- | --- | --- | --- | --- | --- |
| **Element** |  | **Gneiss** |  | **Metasyenite** |  | **Micaschists** |  | **Quartzites** |  |
| **Si** |  | 15.42 |  | 10.93 |  | 18.80 |  | 15.28 |  |
| **O** |  | 44.88 |  | 47.70 |  | 46.43 |  | 47.43 |  |
| **Fe** |  | 15.22 |  | 27.79 |  | 22.60 |  | 24.30 |  |
| **Al** |  | 7.24 |  | 12.90 |  | 10.57 |  | 12.15 |  |
