# Supplementary material for: Influence of petrology on geotechnical characteristics of lateritic gravels from Lolabe-Campo area (Atlantic Ocean, Cameroon) and their valorization in road construction
Source: Research Square preprint supplement (doi:10.21203/rs.3.rs-7895511/v1), 2025-11-04
Supplement: Supplementary file 5 [file 8ca5634ce7498e9ee11af463.docx]

**Table 5:** Valorization of the lateritic gravels in the pavement layers (base layer and sub-base layer) according to the technical specifications

| **Valorization for pavement layers** | | | | | | | | | |
| --- | --- | --- | --- | --- | --- | --- | --- | --- | --- |
|  |  | **Pavement layers** | | |  | **Studied lateritic gravels issued from** | | | |
| **Technical specifications** |  | **Criteria** | **Base layer** | **Sub base layer** |  | **Micaschist** | **Quartzites** | **Metasyenite** | **Gneiss** |
|  |  |  |  |  |  |  |  |  |  |
| **CEBTP (1984)** |  | Minimum dry density MDD (T/m3) | ≥ 2 | Traffic ≤T1-T2 : 1.8  Traffic >T1-T2 : 2 |  | 2.08 | 1.97 | 2.06 | 1.98 |
|  | LL. % | 35% max. | 70% max. |  | 48.73 | 59.88 | 60.40 | 52.28 |
|  | PI % max. | <15 | Traffic T1-T2: 30  Traffic T3-T4: 20  Traffic T5: 20 |  | 23.03 | 25.88 | 25.00 | 26.13 |
|  | 40 mm | 95-100 | 95-100 |  | 100.00 | 100.00 | 95.67 | 98.21 |
|  | 31.5 mm | 85 – 100 | 90-100 |  | 97.21 | 98.58 | 94.00 | 95.49 |
|  | 20 mm | 60 – 100 | 75-100 |  | 85.25 | 95.64 | 87.01 | 91.69 |
|  | 10 mm | 35 – 90 | 58-100 |  | 71.11 | 81.69 | 70.90 | 79.65 |
|  | 5 mm | 20 – 75 | 40-78 |  | 51.04 | 51.91 | 40.67 | 61.51 |
|  | 2 mm | 12 – 50 | 28-65 |  | 36.75 | 34.71 | 28.54 | 45.14 |
|  | 1 mm | 10 – 40 | 22-56 |  | 31.87 | 31.20 | 26.25 | 39.48 |
|  | 0.5 mm | 7 – 35 | 18-50 |  | 29.17 | 28.54 | 23.93 | 34.45 |
|  | 0.08 mm max | 4-20 | Traffic T1-T2: 35  Traffic T3-T4: 30  Traffic T5: 30 |  | 15.93 | 20.95 | 15.64 | 20.68 |
|  | CBR at 95% OPM | Traffic T1: 60  >80 | Traffic T1-T3: 25  Traffic T4-T5-T3: 30  Traffic T5: 35 |  | 33 | 32 | 34 | 31 |
|  |  |  |  |  | **Usable in subbase layer but all gravels have PIs conform for T1-T2 traffic and quartzites and gneiss have MDDs conform for T1-T2 traffic** | | | |
| **Sikali and Djalal (1987) ;**  **Bagarre (1990)** |  | Plasticity product  (Pp) | <250 | Traffic T1-T3: Pp <600  Traffic T4-T5: Pp <250 |  | 378.13 | 534.61 | 392.52 | 488.04 |
|  | OMC | 5-8 | Traffic T1-T3: 7 <OMC <10  Traffic T4-T5: 5 <OMC<8 |  | 11.50 | 12.65 | 11.00 | 12.73 |
|  | MDD | >2.1 | Traffic T1-T3: 2 <MDD<2.25  Traffic T4-T5: MDD>2.1 |  | 2.08 | 1.97 | 2.06 | 1.98 |
|  | CBR | Traffic T1: CBR> 30  Traffic>T1: CBR> 80 | 15-40 |  | 33 | 32 | 34 | 31 |
|  | Classification | GL1 | Traffic T1-T3: GL2  Traffic T4-T5: GL1 |  | **GL2. sub base layer for T1-T3. but OMC not conform for all and MDD for quartzite and gneiss** | | | |
| **Charman's (1988)** |  | Grading modulus  ( Gm ) | ≥1.5 | Envelope curves |  | 2.19 | 2.17 | 2.33 | 2.03 |
|  | PI | Traffic T1-T3: ≤12  Traffic T4-T5≤10 | ≤25 |  | 23.03 | 25.88 | 25.00 | 23.55 |
|  | Plasticity modulus  (Pm) | Traffic T1-T3: ≤300  Traffic T4-T5≤200 | ≤500 |  | 672.73 | 690.52 | 581.43 | 770.37 |
|  | CBR | Traffic T1-T3: CBR at 95% MDD ≥45  Traffic CBR at 100% MDD T4-T5≥65 | CBR at 95% MDD≥25 |  | 33 | 32 | 34 | 31 |
|  |  |  |  |  | **Not usable for subbase and base layer**  **High Pm for all**  **PI not conform for quartzite** | | | |

*CBR: Californian bearing ratio; PI: plasticity index; LL: liquid limit; OPM: modified optimum proctor*
