# Supplementary material for: Influence of petrology on geotechnical characteristics of lateritic gravels from Lolabe-Campo area (Atlantic Ocean, Cameroon) and their valorization in road construction
Source: Research Square preprint supplement (doi:10.21203/rs.3.rs-7895511/v1), 2025-11-04
Supplement: Supplementary file 6 [file df60ab916477f15db6acd6b7.docx]

**Table 7:** Correlation matrix (Pearson) between the geochemical and geotechnical parameters derived from the lateritic gravels

| Variables | CIA | IOL | S/R | Fine | Skeleton | Specific gravity | Pebble | Gravel | Sand | Clays | Gm | Pm | PI | MDD | OMC | CBR at 95% MDD | CBR at 100% MDD |
| --- | --- | --- | --- | --- | --- | --- | --- | --- | --- | --- | --- | --- | --- | --- | --- | --- | --- |
| LOI | 0.11 | **0.80** | **-0.77** | 0.38 | -0.18 | -0.18 | 0.26 | 0.18 | -0.41 | 0.33 | 0.05 | 0.01 | 0.18 | **-0.76** | **0.53** | **-0.61** | -0.49 |
| CIA | **1.00** | -0.29 | 0.09 | -0.03 | 0.00 | 0.20 | -0.08 | 0.00 | 0.01 | 0.10 | 0.03 | 0.04 | 0.12 | -0.15 | 0.21 | -0.14 | -0.03 |
| IOL | -0.29 | **1.00** | **-0.94** | 0.01 | -0.42 | 0.01 | **0.54** | 0.42 | **-0.52** | -0.07 | 0.34 | -0.26 | 0.13 | -0.42 | 0.34 | -0.37 | -0.47 |
| MIA | **0.97** | -0.30 | 0.10 | -0.09 | -0.14 | 0.28 | 0.04 | 0.14 | -0.13 | 0.05 | 0.15 | -0.07 | 0.11 | -0.02 | 0.21 | -0.03 | 0.07 |
| S/R | 0.09 | **-0.94** | **1.00** | 0.00 | 0.39 | -0.19 | -0.50 | -0.39 | 0.47 | 0.07 | -0.31 | 0.22 | -0.13 | 0.39 | -0.45 | 0.29 | **0.58** |
| *Values in bold are different from 0 at a significance level of alpha=0.05* | | | | | | | | | | | | | | | | | |
