# Supplementary material for: Influence of petrology on geotechnical characteristics of lateritic gravels from Lolabe-Campo area (Atlantic Ocean, Cameroon) and their valorization in road construction
Source: Research Square preprint supplement (doi:10.21203/rs.3.rs-7895511/v1), 2025-11-04
Supplement: Supplementary file 7 [file e4e1a00c3d73781bb9ce67c3.docx]

**Table 1:** Description of the lateritic gravel samples collected at Lolabe-Campo.

| **Parent**  **rock** | **Sample codes** | **Field works** | **Laboratory** | | | | | | | | | |
| --- | --- | --- | --- | --- | --- | --- | --- | --- | --- | --- | --- | --- |
| **Matrix** | | **Nodules** | | | | | | | |
| **Color** | **Rate**  **%** | **Color** | **Rate**  **%** | **Types and rates (%)** | | **Cortex** | | **Nucleus** | | **Shape** |
| **Gneiss** | EG1N | Strong brown 7.5YR4/6 | 20 | Brownish Yellow 10YR6/6 | 80 | 1 | 70 | Strong brown 7.5YR5/ 6 | Dusky red (10 R3/3) and red spots (10 R4/6) | | Subrounded to flattened | |
| 3 | 30 | Very dark gray ray 10YR3 /1 | Dark reddish brown (5 YR3/3) with spots of yellowish red (5YR5 /8) | | Rounded | |
| EG4N | Brown 7.5YR4/4 | 25 | Strong brown 7.5YR5/6 | 75 | 2 | 100 | Brownish Yellow 10YR6/ 6 brownish with red parts 10R4/6 | Red 10R4/6 | | Flattened | |
| EG8N | Strong brown 7.5YR4/6 | 35 | Strong brown 7.5 YR5/6 | 65 | 1 | 100 | Dusky red 10R3/2 | Dusky red (10R3/3) with dark red spots 10R3/6 | | Subangular. subrounded | |
| EG9N | Dark yellowish brown  10YR4/6 | 20 | Light Yellowish Brown  10YR6/4 | 80 | 1 | 80 | Dusky red 10R3/4 with strong brown parts 7.5R5/6 | Dusky red 10R3/4 with pink spots 10R8/3 | | Subrounded. elongated. flattened | |
| 3 | 20 | Very Dark Gray 10YR3/1 with Dusky Red 10R 3/4 parts | Dusky Red 10R3/2 with red spots 10R4 /8 | | Rounded | |
|  |  |  |  |  |  |  |  |  |  | |  | |
| **Micaschists** | EM1N | Brownish yellow  10YR6/6 | 25 | Yellowish Brown 10YR5/6 | 75 | 1 | 65 | Strong brown 7.5YR5/6 with weak red parts 10R4/4 | w eak r ed (10R4/4) and pale red spots 10R7/2 | | Elongated | |
| 3 | 35 | Very Dark Gray 10YR3/1 | Dusky Red (10R3/2. 10R3/4) with brownish yellow spots 10YR6/ 6 | | Sub-angular | |
| EM4N | Yellowish brown 10YR5/6 | 35 | Yellowish Brown 10YR 5/6 | 65 | 3 | 40 | Very Dark Gray 10YR3/1 | Very Dark Gray 10YR3/1 with red spots 10R4/8 and dusky red 10R3/4 | | Sub-angular | |
| 1 | 60 | Strong brown 7.5YR5/6 with weak red 10R4/4 parts with micas | Dusky Red 10R3/3 with micas | | Elongated and subangular | |
| EM6N | Yellowish brown  10YR5/8 | 20 | Strong brown 7.5YR5/6 | 80 | 3 | 40 | 10YR3/1 Very dark gray | Very dusky red 10R2.5/2 | | Rounded | |
| 1 | 60 | Reddish Brown 5YR4/3 | Dusky Red 10R3/2. 10R3/4 with red 10R4/8 parts | | Subrounded | |
| EM2N | Dark yellowish  10YR4/4 | 20 | Yellowish Brown 10YR5/4 | 80 | 3 | 25 | Very dark gray 10YR3/1 | Very Dark Gray 10YR3/1 with red 10R4/8 and yellow 10YR7/8 spots | | Sub-angular | |
| 1 | 75 | Strong brown 7.5YR5/6 with parts weak red 10R4/ 4 with micas | Dusky Red 10R3/3 with micas | | Elongated and subangular with micas | |
|  |  |  |  |  |  |  |  |  |  | |  | |
| **Quartzites** | EQ1N | Yellowish Red  (5YR5/8) | 25 | Strong brown (7.5YR5/8) | 75 | 1 | 75 | Dusky red (10R3/3) | Dusky red (10R3/4) | | Elongated | |
| 3 | 25 | Black (10YR2 /1) | Reddish black (10R2.5/1) and pocket Dark Red (10R3/6) | | Sub-angular | |
| EQ2N | Yellowish Red (5RY4/8) | 25 | Strong brown (7.5YR5/8) | 75 | 3 | 15 | Very dark gray (10YR3/1) | Dusky red 10R3/3 with red spots 10R4/8 and yellow (10YR7/8) in traces | | Sub-angular | |
| 1 | 85 | Strong brown (7.5YR5/6) with weak red (10R4/4) parts with micas | Dusky red (10R3/3) with micas | | Flattened and elongated | |
| EQ4N | Strong brown (7.5YR5/8) | 25 | Strong brown (7.5YR5/6) | 75 | 3 | 15 | Very dark gray (10YR3/1) | Reddish black (10R2.5/1) and dark red pocket (10R3/6) | | Rounded | |
| 2 | 70 | Brownish and ellow (10YR6/6) with parts red (10R4/6) | Red 10R4/6 | | Flattened and angular | |
| 1 | 15 | Dark Reddish Brown (5YR3/3) | Dark reddish gray 10R3/1 and pocket of red (10R4/8. rust) | | Subrounded | |
| EQ5N | Yellowish Red  5YR5/8 | 35 | Yellowish Red (5YR5/6) | 65 | 1 | 100 | Dusky red (10R3/3) | Dusky red (10R3/4) with pink spots (10R8/3) | | Angular | |
|  |  |  |  |  |  |  |  |  |  | |  | |
| **Metasyenite**s | ES1N | Strong brown (7.5YR4/6) | 25 | Strong brown (7.5YR5/6) | 75 | 1 | 15 | Dusky red 10R3/3 | Dusky red (10R3/4) | | Rounded sub | |
| 3 | 35 | Black 10YR 2 /1 | Reddish black (10R2.5/1) and pocket of dark red (10R3/6) | | | Rounded | | --- | | |
| 2 | 50 | Yellowish red (5YR5/6) | Dusky red (10R3/4) | | Flattened | |
| ES2N | Yellowish brown  (10YR5/8) | 25 | Strong brown (7.5YR5/6) | 75 | 3 | 15 | Black (10YR2/1) | Reddish black (10R2.5/1) and pocket of dark red 10R3/6 | | Angular | |
| 2 | 85 | Yellowish red (5YR5/6) | Dark reddish brown (2.5YR3/4) with micas | | Flattened | |
| ES5N | Strong brown (7.5YR5/6) | 20 | Strong brown 7.5YR5/6 | 80 | 2 | 60 | Yellowish red (5YR5/6) | Red (10R4/6) | | Flattened and subangular | |
| 1 | 40 | Reddish brown (5YR4/4) | Dusky red 10R3/3 with dark red spots (10R3/6) | | Subrounded | |
